# Supplementary material for: Facile fabrication of three-dimensional highly ordered structural polyaniline–graphene bulk hybrid materials for high performance supercapacitor electrodes
Source: Royal Society of Chemistry journal article supplement (doi:10.1039/c3ta13513f), 2013-10-22
Supplement: c3ta13513f.pdf [file c3ta13513f.pdf]

# Facile fabrication of three-dimensional highly ordered structural polyaniline/graphene bulk hybrid materials for high performance supercapacitor electrodes

Yu Liu,<sup>a</sup> Yu Ma,<sup>a</sup> Shanyi Guang,<sup>b</sup> Hongyao Xu,<sup>\*a</sup> Xinyan Su

<sup>a</sup> State Key Laboratory for Modification of Chemical Fibers and Polymer Materials, College of Materials Science and Engineering, Donghua University, Shanghai 201620, P.R. China. Tel: +86-21-67792228, E-mail: hongyaoxu@163.com

<sup>b</sup> College of Chemistry & Chemical Engineering, Donghua University, Shanghai 201620, P. R. China. Tel: +86-21-67792874  
E-mail: syg@dhu.edu.cn

† Electronic Supplementary Information (ESI) available: The synthetic route of the ST, AFM and HR-TEM images of GO and STGNS, TGA curves of GO, ST, STGNS, PANI and PANI/STGNS10 hybrid, and <sup>1</sup>H NMR spectra of ST. See DOI: 10.1039/b000000x/

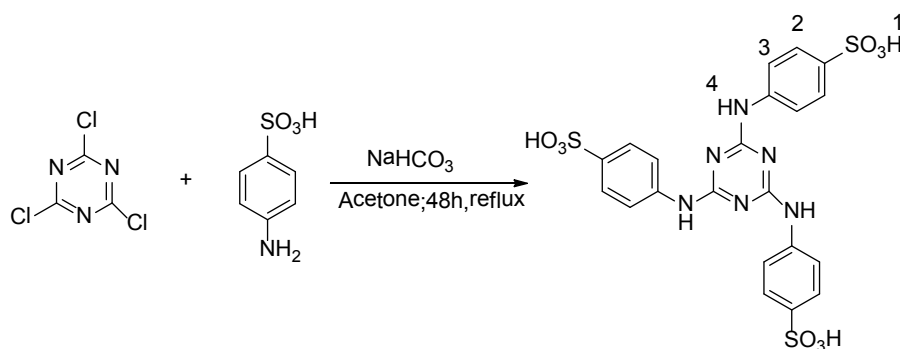

**Scheme S1** The synthetic route of the ST

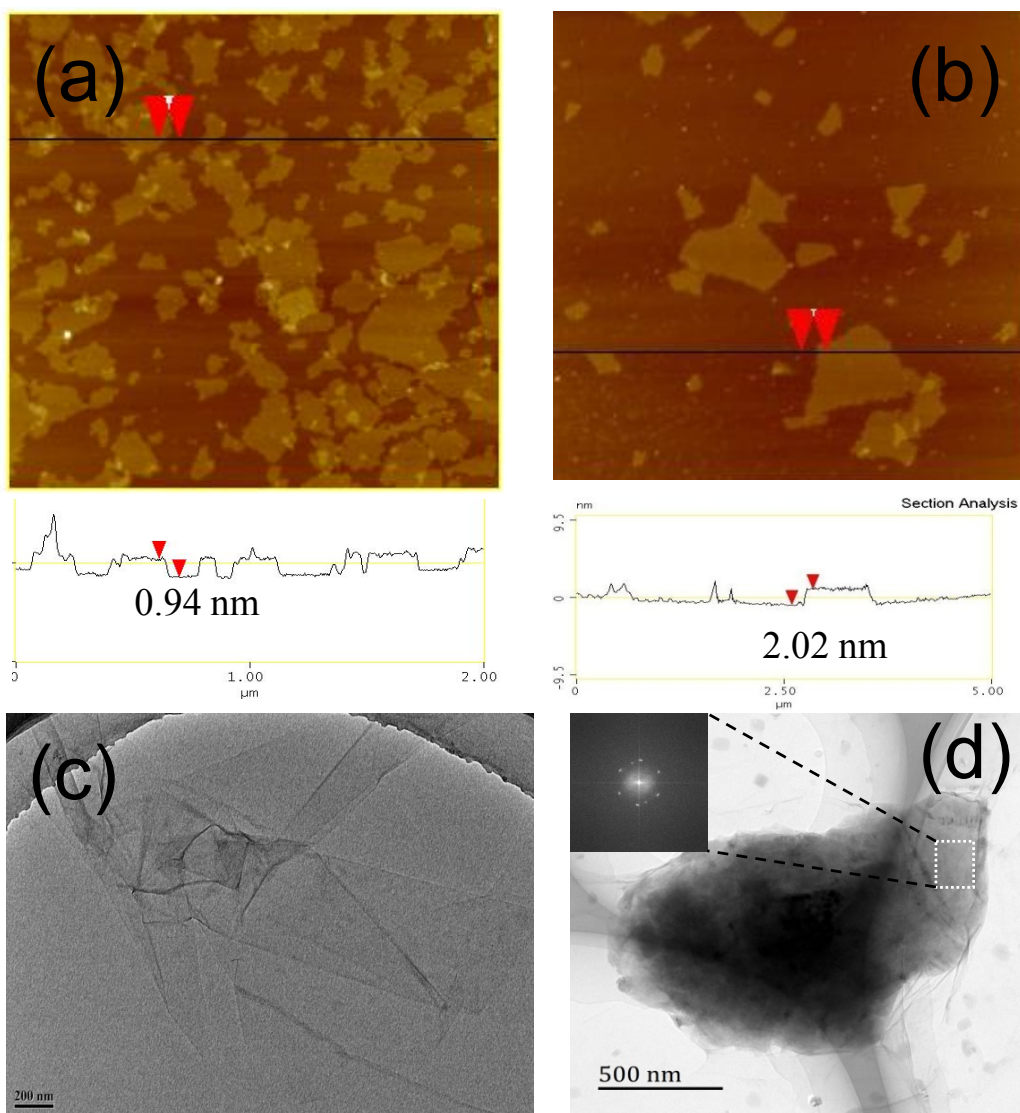

**Fig. S1** AFM images of GO (a), STGNS (b) and corresponding profile curve, respectively. HR-TEM images of GO (c), STGNS (d). The inset in (e) is SAED pattern from crystalline regions.

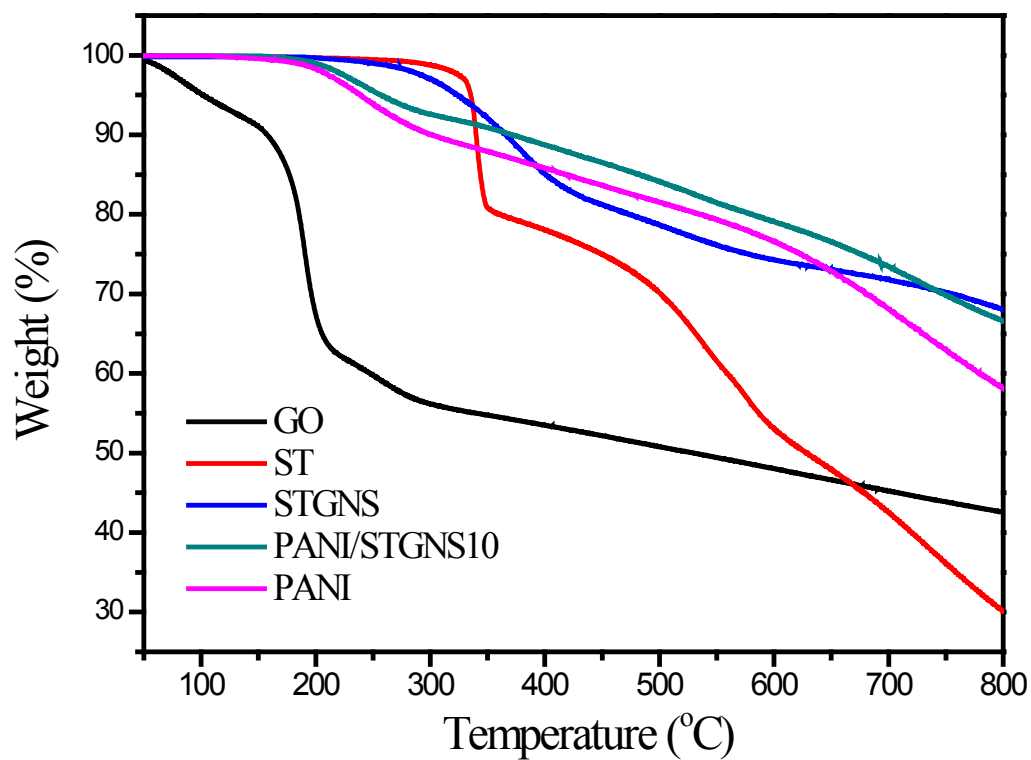

Fig. S2 TGA curves of GO, ST, STGNS, PANI and PANI/STGNS10 hybrid.

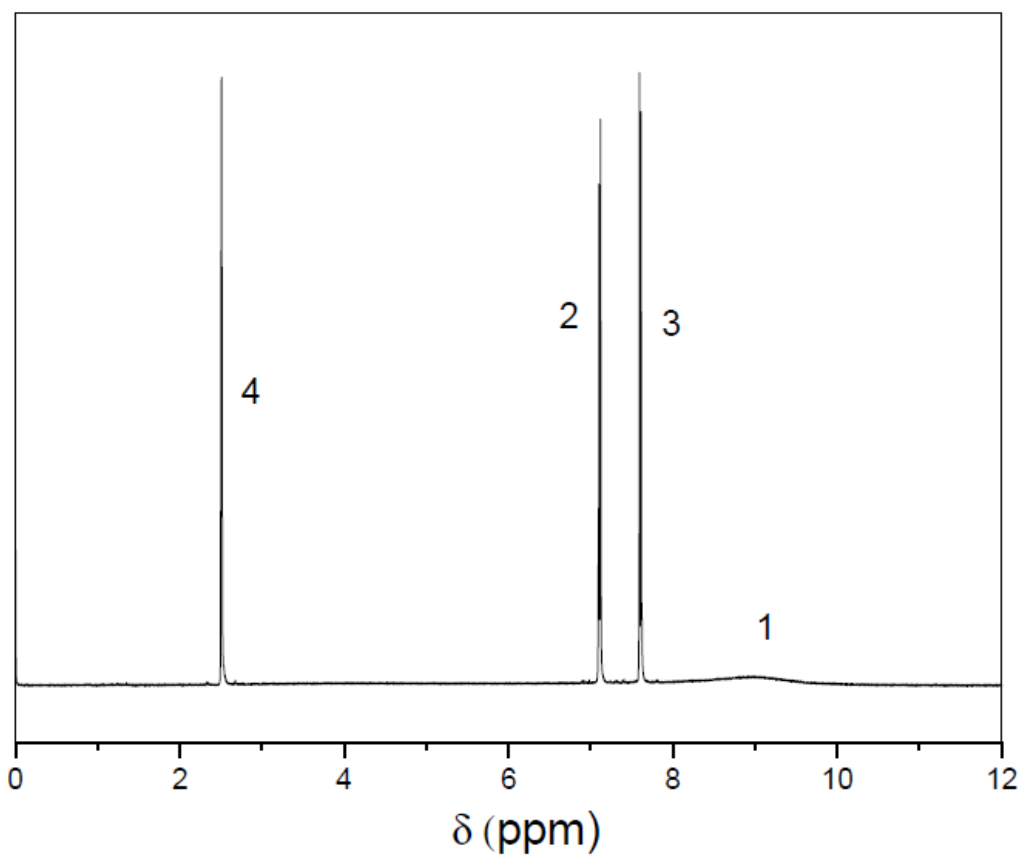

Fig. S3 <sup>1</sup>H NMR spectra of ST
